# Supplementary material for: Aortoenteric Fistula: Clinical Features, Diagnostic Challenges, and Surgical Outcomes — A Retrospective Analysis of 10 Cases
Source: Research Square preprint supplement (doi:10.21203/rs.3.rs-7461607/v1), 2025-10-12
Supplement: Supplementary file 1 [file 99918195b2671a18f8e28b87.docx]

**eTable 1** Clinical features, laboratory testing of the 10 patients.

|  | Clinical Features | | | | | | |  | |  | Laboratory Testing | | | | | |
| --- | --- | --- | --- | --- | --- | --- | --- | --- | --- | --- | --- | --- | --- | --- | --- | --- |
| Case | | Pain | Fever | BP  (mmHg) | GI bleeding | Pulsating mass | Weight  loss | Infection/  sepsis | Anemia | Duration | | WBC  (×109/L) | HGB  (g/dL) | CRP  (mg/L) | PCT (ng/mL) | Bacterial culture |
| 1 | | + | + | 104/66 | + | - | - | + | + | 10 days | | 7.20 | 78 | 93.2 | 0.25 | *Escherichia coli* |
| 2 | | - | + | 107/66 | - | - | - | + | + | 2 years | | 10.7 | 98 | - | - | *Streptococcus constellatus* |
| 3 | | + | - | 120/54 | + | + | - | - | - | 5 days | | 12.68 | 128 | 35.6 | 2.27 | *-* |
| 4 | | + | - | 130/97 | - | - | + | + | + | 1 month | | 8.43 | 78 | 91.6 | 0.68 | *Enterococcus faecium* |
| 5 | | + | + | 126/78 | - | - | - | + | + | 3 years | | 13.65 | 100 | - | 3.72 | *Klebsiella pneumoniae, Escherichia coli* |
| 6 | | - | + | 138/84 | - | - | + | + | + | 6 months | | 7.6 | 97 | 51.1 | - | *Candida albicans* |
| 7 | | + | - | 126/84 | + | - | + | + | + | 1 year | | 7.05 | 106 | - | 0.04 | *Streptococcus sanguinis* |
| 8 | | - | + | 149/75 | + | - | - | + | + | 1 month | | 13.2 | 60 | - | 0.13 | *Candida albicans* |
| 9 | | + | + | 106/63 | + | - | - | + | + | 1 day | | 8.39 | 95 | 8.2 | 0.08 | *Brucella* |
| 10 | | + | + | 120/54 | + | - | - | + | + | 5 days | | 11.58 | 99 | - | 0.45 | *Escherichia coli* |

-Blood Pressure (BP); Gastrointestinal (GI); White Blood Cell Count (WBC); Hemoglobin (HGB); C-Reactive Protein (CRP); Procalcitonin (PCT)

**eTable 2** Surgery information and Outcomes of the 10 patients.

| Case | Aneurysm size (cm, diameter) | Purulence | Bowel  anastomosis | Anastomosis method | Intraoperative blood loss(ml) | Operative time  (min) | NGT  retention  time (day) | Postop- ICU stay (day) | Postop- hospital stay (day) | Surgical complication | Outcome |
| --- | --- | --- | --- | --- | --- | --- | --- | --- | --- | --- | --- |
| 1 | 4.3 | + | DJ | Side-to-side | 10000 | 545 | 9 | 6 | 17 | Cerebral infarction | AF (33m) |
| 2 | 1 | + | DJ | Side-to-side | 2000 | 446 | 10 | 4 | 16 | - | AF (32m) |
| 3 | 0.5 | - | DJ | End-to-side | 1000 | 422 | 7 | 7 | 11 | - | AF (33m) |
| 4 | 2 | + | DJ | Side-to-side | 5000 | 415 | 7 | 3 | 18 | - | AF (32m) |
| 5 | 2 | + | DJ | Side-to-side | 800 | 413 | 23 | 19 | 36 | Intra-abdominal infection | AF (10m) |
| 6 | 2 | + | DJ | Side-to-side | 800 | 400 | 25 | 25 | 25 | Abdominal hemorrhage, infection, anastomotic leak | DP (1m) |
| 7 | 1 | - | DJ | End-to-side | 1500 | 410 | 7 | 1 | 18 | Cerebral infarction,  pulmonary edema | AF (5m) |
| 8 | 1 | + | DA | End-to-side | 800 | 425 | 14 | 2 | 19 | Intestinal obstruction,  anastomotic leak | DP (1m) |
| 9 | 1 | - | DA | End-to-side | 1500 | 368 | 1 | 1 | 11 | - | AF (5m) |
| 10 | 3 | + | DJ | Side-to-side | 800 | 529 | 21 | 4 | 25 | - | AF (3m) |

-Postop: postoperative NGT: Nasogastric tube; DJ: Duodenojejunostomy; DA: Duodenoileal anastomosis

-Outcome: alive at follow-up (AF), alive at discharge (AD), death postoperatively (DP), death intraoperatively (DI), postoperative day (POD), month (m), hospital day (HD), week (w), year (y).
